# Supplementary material for: Nucleic acid functionalized fiber optic probes for sensing in evanescent wave: optimization and application
Source: Royal Society of Chemistry journal article supplement (doi:10.1039/c8ra10125f), 2019-01-01
Supplement: c8ra10125f1.pdf [file c8ra10125f1.pdf]

## Supplementary Information

### Nucleic acid functionalized fiber optic probes for sensing in evanescent wave: Optimization and application

Xiyu Zhu, ‡<sup>a</sup> Ruoyu Wang, ‡<sup>a</sup> Kaidong Xia,<sup>a,b</sup> Xiaohong Zhou <sup>\*a</sup> and Hanchang Shi <sup>a</sup>

<sup>a</sup> State Key Joint Laboratory of ESPC, Center for Sensor Technology of Environment and Health, School of Environment, Tsinghua University, Beijing 100084, China

<sup>b</sup> National Key Laboratory of Science and Technology on Micro/Nano Fabrication, Institute of Microelectronics, Peking University, Beijing 100871, China

\*Correspondence and requests for materials should be addressed to:

Xiaohong Zhou

Email:

[xhzhou@mail.tsinghua.edu.cn](mailto:xhzhou@mail.tsinghua.edu.cn)

Tel: +86-010-62796952

**Chemicals.** HF (30% aqueous solution), HNO<sub>3</sub> and all organic solvents were purchased from Beijing Chemical Works. Sodium chloride (NaCl), bovine serum albumin (BSA), glutaraldehyde (25% aqueous solution), and 3-aminopropyl-triethoxysilane (APTS) were bought from Sigma-Aldrich, Inc. Glycine and cyanoborohydride (NaCNBH<sub>3</sub>) were purchased from AMRESCO LLC.

**Buffers.** All aqueous solutions were prepared using molecular biology grade USP sterile purified water (Corning Cellgro, NY, USA). Tris buffer: 10 mM Tris-HCl, 50 mM NaCl, 50 mM MgCl<sub>2</sub>, pH 7.4; Ade binding buffer: 20 mM Tris, 5 mM MgCl<sub>2</sub>, 300 mM NaCl, pH 7.8; Equilibrium buffer: 10 mM PBS, pH 7.4 (diluted from phosphate buffered saline packs, Thermo Fisher Scientific Inc.); Washing buffer: 0.5% SDS, pH 1.9.

**Instrument.** The diameters were monitored with a microelectrode polisher (2002-C, Inbio Life Science Instrument Co., Ltd., China). The surface morphologies of different fiber surfaces were observed scanning electron microscopy (SEM, JEOL, JSM-700AF).

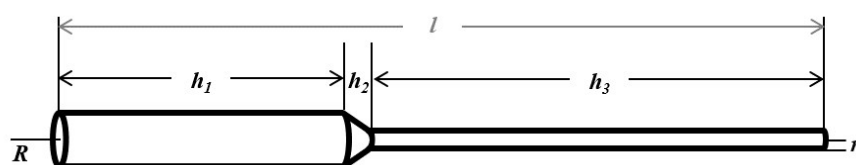

**Fig. S1** Schematic structure of a combination tapered silica fiber after the removal of cladding. ( $l = 8.5$  cm,  $R = 300$   $\mu$ m,  $r = 110$   $\mu$ m,  $h_1 = 3.5$  cm,  $h_2 = 0.2$  cm,  $h_3 = 4.8$  cm)

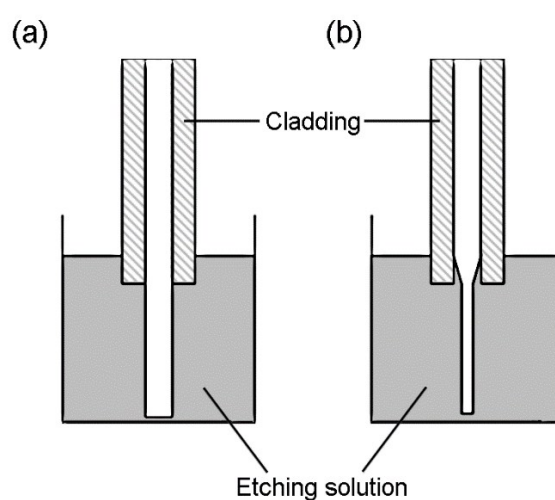

**Fig. S2** Etching solution based wet-process for the fabrication of combination tapered silica fiber. Schematic structure of a silica fiber before (a) and after (b) the etching process.

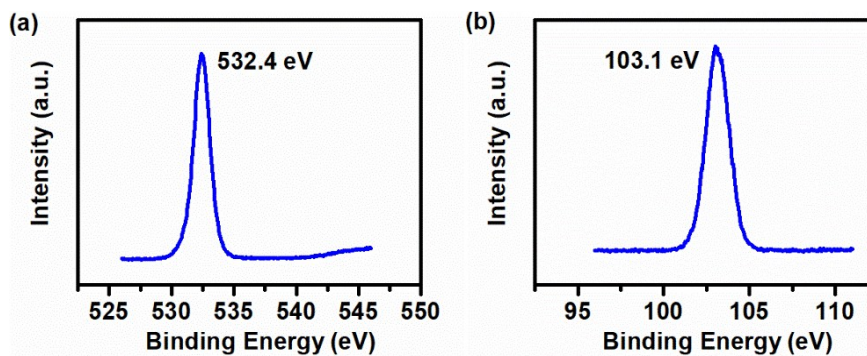

**Fig. S3** XPS spectra of SiO<sub>2</sub> prior to etching: (a) O 1s; (b) Si 2p.

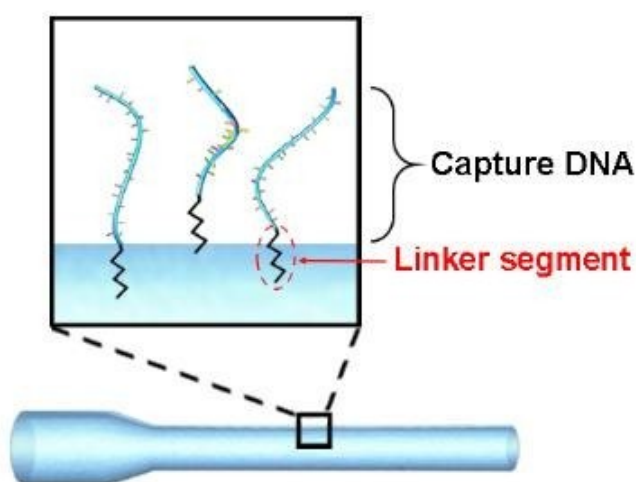

**Fig. S4** Schematic illustration of the ssDNA immobilized EWFO surface. Typically, an immobilized ssDNA contains two regions: the linker segment and the capture DNA.
